## **Mcr-dependent methanogenesis in *Archaeoglobaceae* enriched from a terrestrial hot spring**

Steffen Buessecker<sup>1\*</sup>, Grayson L. Chadwick<sup>2</sup>, Melanie E. Quan<sup>1</sup>, Brian P. Hedlund<sup>3</sup>, Jeremy A. Dodsworth<sup>4</sup>, Anne E. Dekas<sup>1\*</sup>

<sup>1</sup> Department of Earth System Science, Stanford University, Stanford, CA, USA.

<sup>2</sup> Department of Molecular and Cell Biology, University of California, Berkeley, CA, USA.

<sup>3</sup> School of Life Sciences, University of Nevada, Las Vegas, Las Vegas, NV, USA.

<sup>4</sup> Department of Biology, California State University, San Bernardino, San Bernardino, CA, USA.

\* Correspondence to:

S. Buessecker (sbuessecker@stanford.edu), A. E. Dekas (dekas@stanford.edu)

## 5 Abstract

The preeminent source of biological methane on Earth is methyl coenzyme M reductase (Mcr)-dependent archaeal methanogenesis. A growing body of evidence suggests a diversity of archaea possess Mcr, however, experimental validation of hypothesized methane metabolisms has been missing. Here, we provide evidence of a functional Mcr-based methanogenesis pathway in a novel member of the family *Archaeoglobaceae*, designated *Methanoproducendum nevadense*, which we enriched from a terrestrial hot spring on the polysaccharide xyloglucan. Our incubation assays demonstrate methane production that is highly sensitive to the Mcr-inhibitor bromoethanesulfonate, stimulated by xyloglucan and xyloglucan-derived sugars, concomitant with the consumption of molecular hydrogen, and causing a deuterium fractionation in methane characteristic of hydrogenotrophic and methylotrophic methanogens. Combined with the recovery and analysis of a high-quality *M. nevadense* metagenome-assembled genome encoding a divergent Mcr and diverse potential electron and carbon transfer pathways, our observations suggest methanogenesis in *M. nevadense* occurs via Mcr and is fueled by the consumption of cross-fed byproducts of xyloglucan fermentation mediated by other community members. Phylogenetic analysis shows close affiliation of the *M. nevadense* Mcr with those from Korarchaeota, Nezharchaeota, Verstraetearchaeota, and other *Archaeoglobales* that are divergent from well-characterized Mcrs. We propose these archaea likely also use functional Mcr complexes to generate methane on the basis of our experimental validation in *M. nevadense*. Although our stable isotope approach reveals that microbial methanogenesis contributes only a small proportion of the overall methane abundance in the native habitat, divergent Mcr-encoding archaea may be underestimated sources of biological methane in terrestrial and marine hydrothermal environments.

## Introduction

Biological methane has shaped the past (Pavlov *et al.*, 2001; Zahnle, 2006) and present (Arias *et al.*, 2021) planetary climate as an agent of atmospheric warming. However, the full diversity and abundance of microorganisms responsible for biological methane production is still not entirely understood. Earth's major methane source is methyl coenzyme M reductase (Mcr)-dependent metabolism in anaerobic archaea. This 300 kilodalton protein complex catalyzes the terminal step in methanogenesis (Ellefson and Wolfe, 1980; Ermler *et al.*, 1997) as well as the initial step in anaerobic methane oxidation (Hallam *et al.*, 2004). Divergent homologs of the Mcr complex have been identified in metagenome-assembled genomes (MAGs) of uncultured archaea, including the Bathyarchaeota, Verstraetearchaeota, *Methanonatronarchaeia*, Nezharchaeota, *Nitrososphaerales* (syn. Thaumarchaeota), Hadarchaeota, *Archaeoglobales*, ANME-1 and GoM-Arc1 (Evans *et al.*, 2015; Borrel *et al.*, 2019; McKay *et al.*, 2019; Hua *et al.*, 2019). The divergence of these new members of the Mcr family appears to be associated with a transition from methane metabolism to short-chain alkanes, such as ethane (Chen *et al.*, 2019; Hahn *et al.*, 2020) and butane (Laso-Pérez *et al.*, 2016), leading them to be referred to as alkyl-CoM reductases (Acrs). The explosion of MAGs from uncultured archaeal lineages containing Mcr- and Acr-encoding sequences in the last few years has revealed a large uncertainty in our understanding of methane and alkane metabolisms.

Recently, Mcr/Acr complexes have been uncovered in MAGs corresponding to members of the *Archaeoglobi*, cultured representatives of which are not known to catalyze methanogenesis or methanotrophy. One such genome from *Candidatus Polytropus marinifundus*, derived from the deep seafloor along the Juan de Fuca Ridge (Boyd *et al.*, 2019), contained two putative Acr

operons. This archaeon was hypothesized to use these enzymes for the oxidation of alkanes, similar to other Acr-encoding archaea (Chen *et al.*, 2019; Hahn *et al.*, 2020; Laso-Pérez *et al.*, 2016). Despite several reports of small amounts of methane (< 200  $\mu\text{mol L}^{-1}$  culture) produced by *Archaeoglobus* isolates (Stetter *et al.*, 1987; Beeder *et al.*, 1994; Huber *et al.*, 1997; Mori *et al.*, 2008), a role in methane metabolism in this organism seemed unlikely in light of the high-degree sequence divergence from experimentally validated Mcrs and, moreover, methanogenesis has been suggested to have been lost in the *Archaeoglobi* (Baptiste *et al.*, 2005). In contrast, a survey of metagenomic data from hot springs and oil reservoirs revealed additional, phylogenetically distinct MAGs of the family *Archaeoglobaceae* containing canonical Mcr operons (Liu *et al.*, 2020) and, thus, pointing toward the potential for methane metabolism in the class *Archaeoglobi*. However, experimental evidence of significant methane production or consumption in the *Archaeoglobi* in association with a functional Mcr complex has been lacking and their role in methane cycling in their thermal habitat remained unresolved. While methanogenic activity occurs in marine systems at temperatures of up to 122 °C (Takai *et al.*, 2008), *in-situ* substrate abundances may limit methanogenesis in terrestrial systems (Hedlund *et al.*, 2015) where it has been observed at  $\leq 75$  °C. In light of the substrate diversity of divergent Mcrs it may, thus, be conceivable that phyla using divergent Mcrs for methane production showed higher temperature resistance.

We investigated methane metabolism in a member of the *Archaeoglobaceae*, here designated *Methanoproducendum nevadense* XG-1, that was enriched in a mixed, anaerobic culture from Great Boiling Spring (GBS), Nevada, while fed with the polysaccharide xyloglucan (XG). After detecting methane in the headspace of the culture, we hypothesized *M. nevadense* to be

responsible for methane formation and assessed effects of a suite of different substrates and  
75 inhibitors on methane production. Analysis of the medium-quality XG-1 MAG, the only Mcr-  
encoding member of the enrichment culture, and a conspecific high-quality MAG designated  
*Methanoproducendum nevadense* GBS<sup>Ts</sup> from an *in-situ* anaerobic ammonia fiber expansion  
(AFEX)-treated corn stover enrichment in GBS suggests an Mcr-dependent pathway with  
electrons sourced from organic compounds in conjunction with H<sub>2</sub>. Our study demonstrates Mcr-  
80 based methane production in a member of the *Archaeoglobaceae*, a group previously unknown  
to include true methanogens, describes the underlying ecology and physiology, and provides a  
link to biological methane production in a terrestrial hydrothermal setting.

## Methods

85 ***In-situ* enrichments and laboratory cultivation.** The geochemistry and microbiology of Great Boiling Spring (GBS) near Gerlach, Nevada (Costa *et al.*, 2009; Cole *et al.*, 2013), and Little Hot Creek (LHC) in California's Long Valley caldera (Vick *et al.*, 2010) have been described previously. *In-situ* enrichments on 1 g of ammonia-fiber explosion (AFEX) corn stover sealed in 100  $\mu$ m nylon mesh bags were performed in the GBS main pool from 26 October 2013 to 28  
90 March 2014 as described in (Peacock *et al.*, 2013), which enriched for *Archaeoglobi* before. At LHC, *in-situ* enrichments were deployed the same way from 19 Oct 2013 to 6 April 2014. Transfer to GBS mineral salts medium followed an established approach (Buessecker *et al.*, 2022) with the difference that 0.02 % (m/v) xyloglucan served as a sole carbon source and a trace metal solution was added according to Hanada et al. (Hanada *et al.*, 1995).

95 **Genomic DNA extraction.** DNA was extracted from the XG-degrading culture by bead-beating with the Fast DNA SPIN Kit for Soil (MP Biomedicals) according to a slightly modified protocol (Buessecker *et al.*, 2022).

100 **16S rRNA gene tag sequencing.** 16S rRNA gene tag amplification and sequencing on initial enrichment cultures was performed essentially as described (Kozich *et al.*, 2013). A modified forward primer 515 (5' GTGYCAGCMGCCGCGGTAA) with a Y instead of a C at the 4<sup>th</sup> position from the 5' end was used to increase coverage of archaea, and a corresponding change was made to the SeqRead1 primer (Buessecker *et al.*, 2022). Sequencing (2×250 bp) was  
105 performed on an Illumina iSeq sequencer using the V2 reagent kit and reads were processed with the DADA2 pipeline using the Silva database for taxonomy (Callahan *et al.*, 2016).

# **Metagenomic sequencing, assembly, analysis and binning of MAGs.** Extracted culture DNA

was sequenced using the Illumina MiSeq platform (short reads), along with Oxford Nanopore

sequencing (long reads). Shotgun metagenome sequencing with Illumina MiSeq (2x250 bp) was

performed at Argonne National Laboratories, with library preparation using the Nextera Flex

DNA kit. For Oxford Nanopore sequencing, libraries were prepared following the Native

Barcoding (EXP-NBD103) and Ligation Sequencing (SQK-LSK108) Kit 1D protocols according

to the manufacturer's instructions, and sequencing was performed on a MinION FLO-MIN106

flow cell (Oxford Nanopore, Oxford Science Park, UK). Reads were mapped to known

*Archaeoglobi* reference genomes using BowTie 2 (Langmead and Salzberg, 2012). The mapped

short and long reads were assembled with hybridSPAdes (Antipov *et al.*, 2016) and the resulting

contigs were filtered, merged, and dereplicated. This assembly was then subjected to binning

with MetaBAT2 v. 1.7 (Kang *et al.*, 2019), as implemented in KBase (Arkin *et al.*, 2018). Bins

were refined to reduce redundancy and contamination with Anvi'o (Eren *et al.*, 2021) and MAG

quality and classification was determined using CheckM v1.4.0 (Parks *et al.*, 2015) and the

GTDB Toolkit v1.1.0 (Chaumeil *et al.*, 2020) in KBase. Because the *Archaeoglobaceae* MAG

obtained from the enrichment culture was only of medium quality, we compared it to MAGs

previously derived from GBS metagenomes by our group using the JSpeciesWS online server

(Richter *et al.*, 2016). Bin 20 of metagenome 3300005298 in the JGI database was shown to

belong to the same species, with an average nucleotide identity (ANI) of 98.4 % and was

therefore used for comparative genomics. To screen metagenomic raw reads for *mcrA*, GraftM

version 0.13.1 (Boyd *et al.*, 2018) was trained using the 499 *mcrA* sequences obtained from

NCBI's PSI-Blast (default configuration) with an e-value of  $10^{-9}$ . *McrA* sequences were aligned

with IQ-TREE (Trifinopoulos *et al.*, 2016) using 0.5 perturbation strength and 1,000 iterations, and the alignment was visualized in the iTOL interface version 6 (Letunic and Bork, 2021). All 76 genomes from the GTDB release 207 in the class *Archaeoglobi* were retrieved and supplemented with four additional genomes from IMG and our incomplete MAG from the xyloglucan enrichment for 80 total genomes. All genomes were assessed for completeness and contamination using CheckM v1.4.0 implemented on the KBase platform. The concatenated, masked alignment of 43 marker genes produced by CheckM was used to generate a phylogenomic tree using RAxML v8.2.12 implemented on XSEDE via the CYPRES Science Gateway v3.3, with the following parameters: protein substitution model: PROTGAMMA, protein substitution matrix: WAG, with 100 iterations of rapid bootstrapping.

**Batch incubation experiments.** At the beginning of stationary phase, 100  $\mu\text{L}$  of growing culture was transferred to fresh anoxic media amended with filter-sterilized, anoxic stock solutions added with a flushed syringe. All substrate stocks were prepared using molecular grade reagents and the final concentrations were the following: 0.02 % (w/v) xyloglucan, 0.05 % (w/v) of each monosaccharide (L-fucose, D-galactose, D-xylose), 500  $\mu\text{M}$  of each organic acid (acetate, pyruvate, malate, dimethylsulfoniopropionate), 1 mM 2-methoxybenzoate, and 500  $\mu\text{M}$  trimethylamine. Xyloglucan was added as powder directly to the media. The  $\text{H}_2/\text{CO}_2$  (20:80) mix was added to reach 0.7 bar overpressure. The antibiotic treatment consisted of 100  $\mu\text{g mL}^{-1}$  streptomycin and 100  $\mu\text{g mL}^{-1}$  carbenicillin. The inhibitor bromoethanesulfonate (BES) was added to a final concentration of 10 mM and coenzyme M was added at 140  $\text{mg L}^{-1}$ . The base medium contained 3.1 mM sulfate and traces of sulfate in a trace metal solution, which was all left out in the  $-\text{SO}_4^{2-}$  treatment.



**Methane and hydrogen gas measurements.** Culture headspace was sampled with flushed

syringes into 12 mL exetainers by replacement with N<sub>2</sub>. Using a xyzTek Bandolero auto sampler, gas from 12 mL exetainers was drawn into a gas chromatograph (Shimadzu GC-2014) equipped with a flame-ionization detector (FID) kept at 250 °C. A 1 m HayeSep N pre-column was serially connected to a 5 m HayeSep-D column conditioned at 75 °C oven temperature. Nitrogen gas (UHP grade 99.999 %, Praxair Inc.) served as carrier with 21 mL min<sup>-1</sup> flow rate. Methane concentration measurements were calibrated with customized standard mixtures (Scott Specialty Gases, accuracy ± 5 %). Gas phase concentrations were corrected to account for dilution using Henry's law with the dimensionless concentration constant  $K_{cc}^H(\text{CH}_4) = 0.0249$  for gas dispersion into the aqueous phase at 73 °C.

H<sub>2</sub> gas concentration in 12 mL exetainer samples was determined with a reactive mercury bed reduced gas analyzer (Peak Laboratories). Gas samples (250 µL) were injected with a gas-tight syringe (VICI) into an N<sub>2</sub> carrier gas stream through a Unibeads 1S and a Molecular Sieve 13X column conditioned at 104 °C. The retention time for H<sub>2</sub> was 51 seconds. Blank controls, consisting of uninoculated media with xyloglucan, never produced H<sub>2</sub> above the detection limit. The analyzer was calibrated using a 100 ppm H<sub>2</sub> standard (Scott Specialty Gases, accuracy ± 5 %) that was serially diluted with nitrogen gas.

***In-situ* incubations and gas sampling.** To determine methane production rates in the source pool of GBS, as well as nearby source pools G04b and SSW, hot spring sediment was transferred into a glass flask that was continuously flushed with N<sub>2</sub>. Fresh hot spring water was N<sub>2</sub>-sparged and used to dilute the sediment 1:4. The sediment slurry was distributed into pre-flushed vials

with a 18G needle. *In-situ* incubations did not receive substrates and the closed, anoxic vials were placed into the spring. Methane production rates were calculated based on the accumulation of methane derived from headspace sampled at the spring. Gas for stable isotope analysis was extracted from water collected with a 60 mL syringe at ~15 cm depth. Half the syringe was filled with sample water after which the other half was filled with N<sub>2</sub>. The dissolved gas was equilibrated with the N<sub>2</sub> by shaking the syringe for 10 minutes. The gas phase was then injected into evacuated 12 mL exetainers.

**Stable isotope analysis.** Isotopes of C and H in methane gas were analyzed using a Thermo Scientific GasBench-Precon concentration unit interfaced to a Thermo Scientific Delta V Plus isotope ratio mass spectrometer (IRMS) at the UC Davis Stable Isotope Facility and data collection followed the method by Yarnes (Yarnes, 2013).

# Results

190

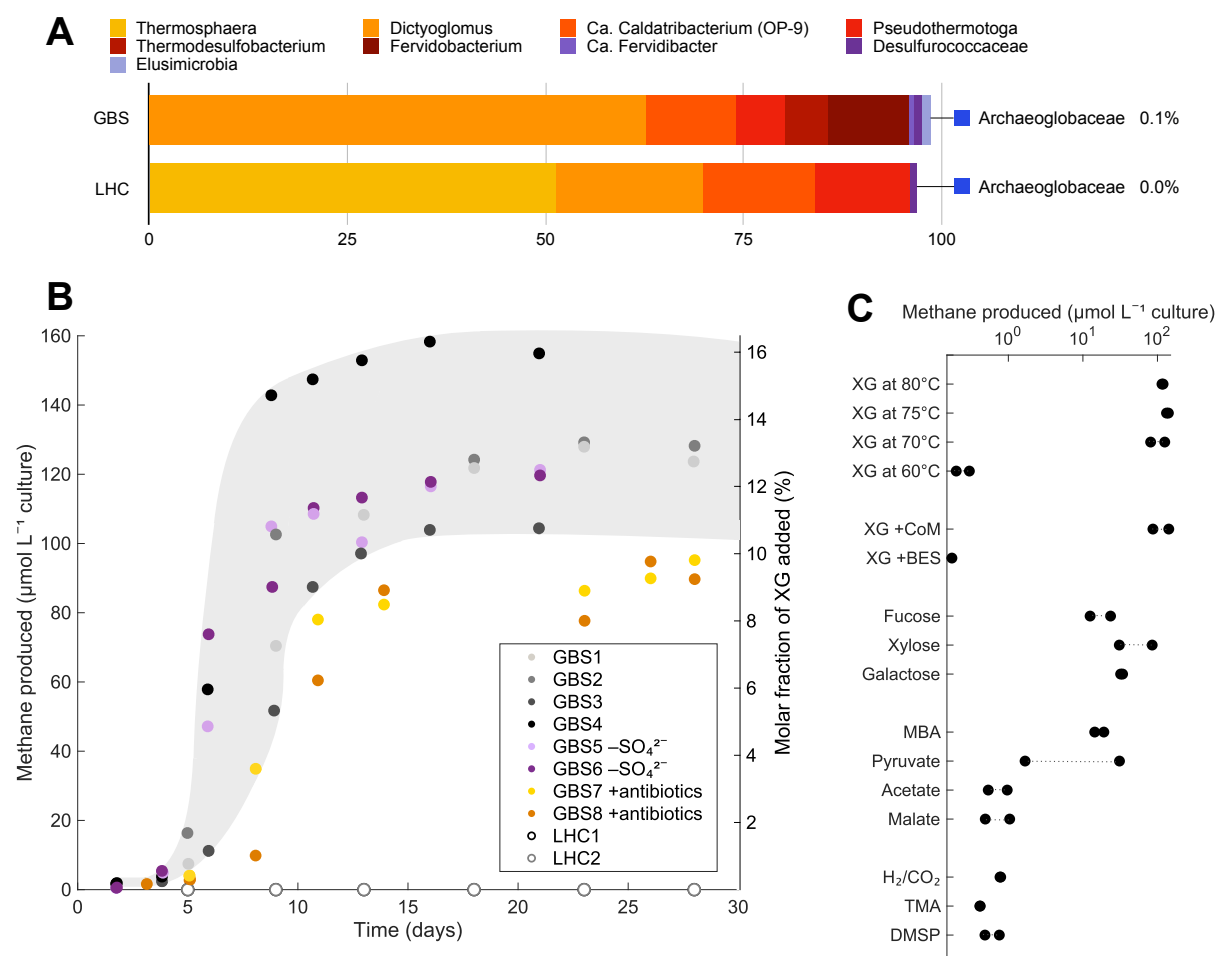

**Fig. 1.** Community composition and methane production data of the xyloglucan-degrading culture. **A** Community composition (%) in anaerobic enrichments from Great Boiling Spring (GBS) and Little Hot Creek (LHC) based on 16S rRNA gene tags. Taxa are identified at the lowest named rank according to Silva. All *Archaeoglobaceae* sequences detected belong to *M. nevadense*. **B** Headspace methane concentration over time. The second y-axis shows the relative amount of methane derived from the organic carbon added. The antibiotics mix consisted of streptomycin and carbenicillin to specifically target bacteria. Approximate range in values from four GBS cultures is colored in gray.  $\text{SO}_4^{2-}$ , sulfate. **C** Headspace methane concentrations in duplicate treatments on day 15. If not specifically indicated, incubation temperature was maintained at 75 °C. Methoxybenzoate, MBA; Trimethylamine, TMA; Dimethylsulfoniopropionate, DMSP.

**Methane formation in the xyloglucan-degrading culture.** After screening diverse thermophilic

enrichments for methanogenic activity, we detected methane in the headspace of an anaerobic culture derived from Great Boiling Spring (GBS), Nevada. Another enrichment maintained under identical conditions derived from Little Hot Creek (LHC), California, did not show detectable methane. Both cultures were supplied with XG. The cultures contained comparable abundances of *Candidatus* Caldatribacterium species (11.1-13.9 %) and *Pseudothermotoga* (6.4-12.3 %) but differed particularly in one member belonging to the family *Archaeoglobaceae*, here introduced as *Methanoproducendum nevadense*. Although at a low proportion (0.1 %), *M. nevadense* was present in GBS but not in LHC (Fig. 1A).

After transfers into fresh media, we henceforth measured methane production in microcosms and assessed the influence of potential stimulants and inhibitors. The XG enrichment from LHC did not produce methane at any time during the experiment, while the GBS culture reached 104-158  $\mu\text{mol methane L}^{-1}$  after two weeks of incubation at 75 °C, which appeared to be the optimal temperature for methane production (Fig. 1B, C). At that time, there were  $1.2\text{-}2.0 \times 10^8$  cells  $\text{mL}^{-1}$  culture based on direct total cell counts. Methane formation at 80 °C was not significantly lower than that at 75 °C (Student's t-test,  $P < 0.05$ ) and we also observed methane in cultures grown at 85 °C (data not shown). Methanogenesis in the *Archaeoglobi* may, hence, increase the known temperature limit of terrestrial methanogenesis by 5-10 °C (Hedlund *et al.*, 2015). We henceforth refer to the culture from GBS (and not LHC) as XG-degrading culture. The omission of sulfate as a potential oxidant for anaerobic respiration and the addition of antibiotics targeting bacteria resulted in only minor differences in methane formation (Fig. 1B). Amendment with coenzyme M (CoM), an essential nutrient for some methanogens (Taylor *et al.*, 1974) and one

species of non-methanogenic *Archaeoglobus* (Mori *et al.*, 2008), did not increase activity or growth. In contrast, addition of bromoethanesulfonate (BES), a structural analog to methyl-CoM and commonly used methanogenesis inhibitor specifically targeting Mcr, halted methane production completely (Fig. 1C). We then tested if monosaccharide products of XG breakdown, specifically fucose, xylose, or galactose, would stimulate methane production in the absence of XG, however, less than half the amount of methane was produced (with the exception of one xylose replicate reaching ~85  $\mu\text{mol methane L}^{-1}$ ). Interestingly, incubations with methoxybenzoate (MBA) supported 14-19  $\mu\text{mol methane L}^{-1}$ , suggesting the capacity for methoxydotrophic methanogenesis (Mayumi *et al.*, 2016). Other organic acids and well-known methanogenic substrates ( $\text{H}_2/\text{CO}_2$ , TMA, DMSP) resulted in low methane formation ( $< 10 \mu\text{mol methane L}^{-1}$ ), with ambiguous results from pyruvate incubations (Fig. 1C).

**A functional, divergent Mcr in *M. nevadense*.** To better understand the pathway of methane generation in *M. nevadense*, we carried out metagenome sequencing of our enrichment cultures. Despite the low abundance of *M. nevadense* as determined by 16S rRNA gene sequencing, we were able to recover a MAG estimated to be 63 % complete with 2.4 % contamination (*M. nevadense* XG-1). GTDB\_tk placed this MAG within the genus “WYZ-LMO2” (Wang *et al.*, 2019), members of which were reported to contain Mcr operons and originally named *Candidatus* Methanoproducendum (Hua *et al.*, 2019) or later described with the synonym *Candidatus* Methanomixophus (Liu *et al.*, 2020). Phylogenomic analysis of currently available *Archaeoglobi* genomes placed our MAG together with “Bin 20”, or *M. nevadense* GBS<sup>Ts</sup>, which was derived from an *in-situ* AFEX-treated corn stover enrichment (IMG: 3300005298\_20) (Peacock *et al.*, 2013). These two MAGs represent the same species, sharing 98.4 % average

nucleotide identity (Yoon *et al.*, 2017) with a tetra-nucleotide index of 0.996 (Table S1). Since the 1.6 Mb-comprising MAG from the *in-situ* enrichment was far more complete (98 % and 3.7 % contamination), the genomic analysis below focused on *M. nevadense* GBS<sup>Ts</sup>. Screening the unassembled metagenomic reads for the *mcrA* gene using GraftM revealed a gradual enrichment of *M. nevadense* from 0.3 % in GBS sediment, over 10 % in the *in-situ* cellulolytic enrichment (corn stover bag), to 100 % in the XG enrichment culture (Fig. 2A), suggesting that while a diversity of Mcr-containing organisms is present *in-situ*, *M. nevadense* was the sole source of methane in our incubations. The phylogenetic placement of the recruited McrA is close to the “WYZ-LMO2” McrA on a monophyletic branch with protein sequences derived from Korarchaeota, Nezharchaeota, and Verstraetearchaeota (Wang *et al.*, 2019) (Fig. 2B). Although the McrA shows affiliation with Archaea outside of the Euryarchaeota, a genome tree derived from an alignment of 43 genomic markers placed *M. nevadense* among other Euryarchaeota within the family *Archaeoglobaceae* with strong support. Based on monophyly and ANI values > 95 % (Jain *et al.*, 2018), MAGs derived from GBS belong to a single species in the genus *Methanoproducendum* with *M. nevadense* GBS<sup>Ts</sup> as the nomenclatural type for the species (Fig. 2C, Table S2), whereas genomes representing other species in the genus have been recovered from Yellowstone National Park or Jinze Hot Spring in Tengchong, China (Hua *et al.*, 2019; Wang *et al.*, 2019; Liu *et al.*, 2020). To promote best practices in systematics, a protologue for this new species is included in the Supplements, and *M. nevadense* together with *Methanoproducendum hydrogenotrophicum* (type is Bin16<sup>Ts</sup>), *Methanoproducendum dualitatem* (type is LMO3<sup>Ts</sup>), and *Methanoproducendum nevadense* (type is GBS<sup>Ts</sup>) will be registered as species belonging to the genus *Methanoproducendum* in the SeqCode Registry (Hedlund *et al.*, 2022).

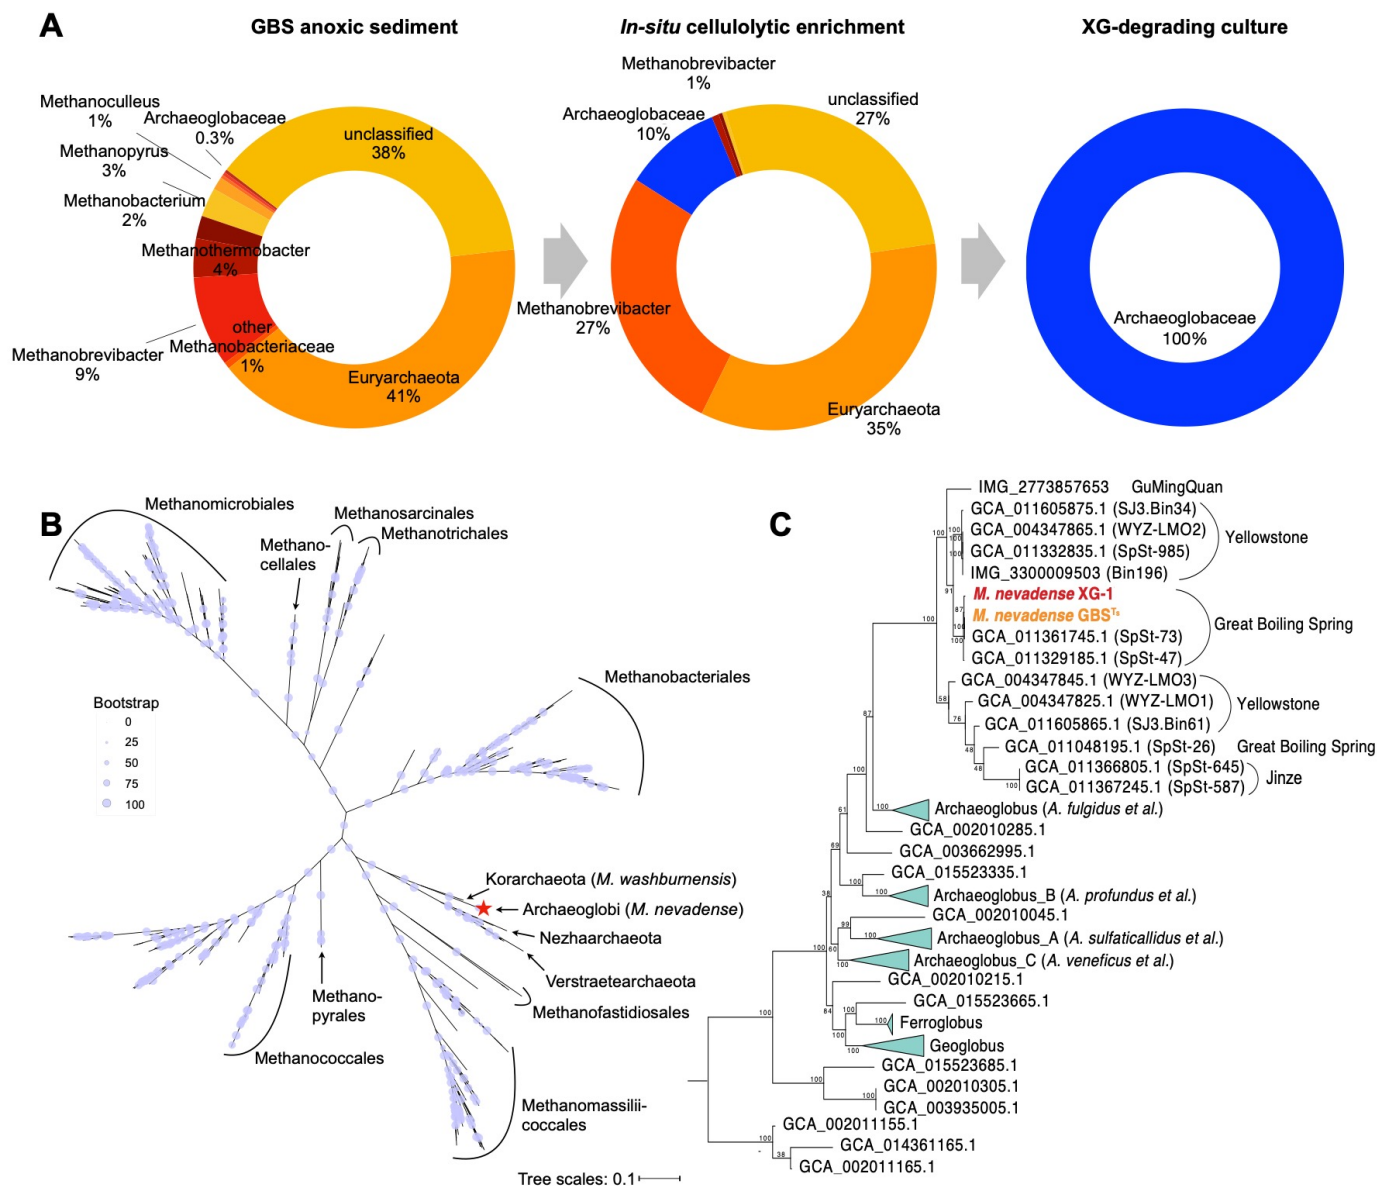

**Fig. 2.** Enrichment of *M. nevadense* among multiple McrA-encoding taxa in GBS. **A** Genus-level classification of *mcrA* gene sequences in the original GBS sediment, the *in-situ* cellulolytic enrichment, and culture, following an enrichment trend of *M. nevadense*. **B** Phylogenetic relationship between *M. nevadense* McrA (red star) and 499 related McrA amino acid sequences aligned by PSI-Blast. **C** Genome tree of the two *M. nevadense* MAGs and 78 other *Archaeoglobi* genomes. *M. nevadense* forms a distinct branch with McrA from other species of *Methanoproducendum*.



**Potential carbon and electron transfers in *M. nevadense* methanogenesis.** The *M. nevadense*

MAG encodes several methane-specific metabolic features that could support a variety of pathways for methane generation and energy conservation. Most conspicuous are the Mtr and Mcr operons, which are only known to function in methane-metabolizing organisms, catalyzing the penultimate and final steps of methanogenesis (Fig. 3). Besides these operons, the Wood-Ljungdahl (WL) pathway is largely the same as in other *Archaeoglobi* and could be used in either the anabolic direction for acetyl-CoA generation or in the catabolic direction for multi-carbon substrate breakdown. An important difference is absence of the main subunit of Mer (Methylenetetrahydromethanopterin reductase), which carries out one of the key C1 oxidation/reduction steps in this pathway (Fig. 3). This absence was reported in a previous analysis of similar MAGs (Liu *et al.*, 2020), but we add here that two homologs of Mer are encoded in this genome (as well as cultured *Archaeoglobus* strains). Mer and its homologs are part of the large luciferase-like monooxygenase family (pfam00296) and it is possible one of these paralogs is able to complete the C1 pathway between CO<sub>2</sub> and methyl oxidation states. However, an incomplete WL pathway could explain the inability of *M. nevadense* to use H<sub>2</sub> as a sole methanogenic substrate in our experiments.

Methyl groups on H<sub>4</sub>MPT or CoM could be reduced to methane in two ways. First, six electrons could be generated by oxidizing a methyl group to CO<sub>2</sub> through the WL pathway, which could be used for the reduction of three other methyl groups to methane (Methyl disproportionation, dark blue, Fig. 3). This would rely on the distant homologs of Mer as described above. Second, electrons sourced from hydrogen could be used to reduce methyl groups to methane (Methyl reduction, light blue, Fig. 3). A third possible route of carbon into this pathway could be through



the breakdown of multicarbon compounds via pyruvate and acetyl-CoA. These carbons would end up as CO<sub>2</sub> (in oxidation reactions producing reduced Fd) and methyl groups on H<sub>4</sub>MPT (green path, Fig. 3).

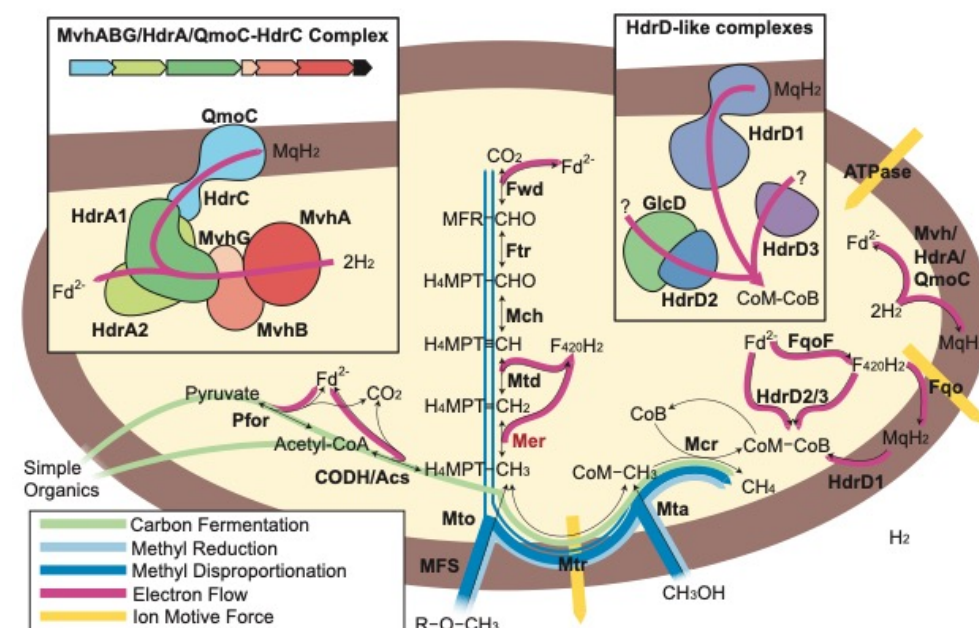

**Fig. 3.** Possible methanogenesis pathways in *M. nevadense*. Key genes encoded in the *M. nevadense* GBS<sup>Ts</sup> MAG are shown along with pathways for carbon and electron flow that would be consistent with our substrate incubation experiments. All genes present in the genome are shown in bolded black letters, including six of the seven traditional methanogenesis pathways (Fwd, Ftr, Mch, Mtd, Mtr and Mcr, see Table S3). The ability to incorporate methyl groups from methanol and methoxylated compounds is enabled by the Mta and Mto complexes, respectively. Methyl groups could be used for methanogenesis on their own via methyl disproportionation (dark blue), or methyl reduction with electrons from hydrogen (light blue). An additional possibility is the degradation of more complex carbon compounds for carbon and electrons (light green). Electron flow (pink) to the CoM/CoB heterodisulfide could be supported by three HdrD homologs found in the MAG (inset, top right). The HdrD2-GlcD gene cluster is found together with the Mtr operon and associated methanogenesis genes, making this the most likely candidate. Another conspicuous electron transport gene cluster is highlighted in the top right, consisting of a NiFe hydrogenase, two HdrA homologs, and a membrane-bound cytochrome b HdrC-QmoC fusion expected to interact with the menaquinone pool. The flow of methyl groups through Mtr (depending on the direction) and electron flow through Fqr generates an ion motive force (yellow), ultimately generating ATP via ATP synthase.

There are a variety of electron transfer complexes encoded in the *M. nevadense* MAG that could support electron flow from Fd, F<sub>420</sub>H<sub>2</sub> or H<sub>2</sub> onto HdrD. An Fqr complex very similar to the one

characterized in *A. fulgidus* is found in the genome and would be able to transfer F<sub>420</sub>H<sub>2</sub> electrons onto menaquinone (Brüggemann *et al.*, 2000). Fd electrons are the lowest potential, and could possibly pass to F<sub>420</sub>H<sub>2</sub> through soluble FqoF or directly onto Fqo *sans* Fqof, both of which have been proposed as options in cultured methanogens (Welte and Deppenmeier, 2011). A

335 fascinating gene cluster containing the [NiFe] hydrogenase subunits MvhABG, two HdrA homologs, and a fusion of QmoC and HdrC is found in the *M. nevadense* MAG and is absent in the cultivated non-methanogenic *Archaeoglobi*. The QmoABC complex is normally found in *Archaeoglobi* and other sulfate reducers and is thought to carry out electron transfer from menaquinone to AprAB during sulfate reduction (Duarte *et al.*, 2016). AprAB is absent from *M.*  
340 *nevadense* along with the other key sulfate reduction proteins Sat, DsrAB and DsrMKJOP. QmoABC has been proposed to bifurcate electrons (Appel *et al.*, 2021), and in the absence of its recognized partners in QmoAB or AprAB, it is tempting to speculate this complex is involved in electron flow between H<sub>2</sub>, ferredoxin and menaquinone.

345 These electron flow reactions would likely be associated with the generation of a proton motive force, either through vectorial proton pumping at Fqo, or through quinol loops at the b-type cytochromes in the QmoC homologs. Also, depending on the direction of carbon flow through Mtr, additional sodium motive force maybe be generated at this step. Ion motive force ultimately would be used for the generation of ATP through ATP synthase.

350 **XG-degrading culture consumes H<sub>2</sub> concomitant to methane production.** Because of the apparent discrepancy between the genetic potential to consume H<sub>2</sub> for methanogenesis and the very low activity observed in H<sub>2</sub>/CO<sub>2</sub> incubations, we tested if the enriched microbial community

produces  $H_2$  and if there would be a difference in  $H_2$  with the application of BES. If Mcr-based

methanogenesis consumed  $H_2$ , there would be more  $H_2$  available in BES-inhibited cultures.

Indeed, 12 to 20 days after XG incubation we detected  $H_2$  in the culture headspace, indicating  $H_2$

production by members of the culture. We furthermore observed more than twice the  $H_2$

accumulation when BES was added (Fig. 4). This implies  $H_2$  consumption during

methanogenesis by the XG-degrading culture and suggests *M. nevadense* is co-dependent on  $H_2$

and on another, unknown compound (see discussion).

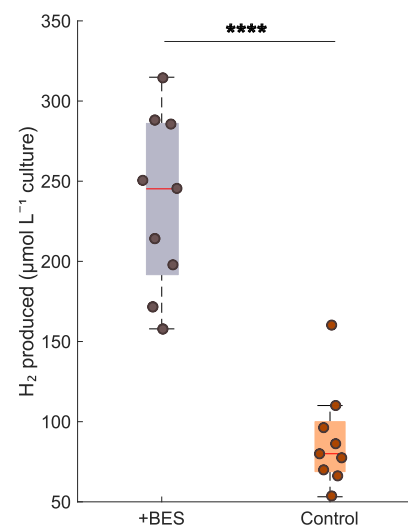

**Fig. 4.** Headspace  $H_2$  concentration in triplicate cultures between day 12 and 20.  $H_2$  was significantly more abundant in +BES incubations (ANOVA, \*\*\*\* $p < 0.0001$ ,  $n = 9$ ). Central marks in boxes indicate the median, while the bottom and top edges are the 25<sup>th</sup> and 75<sup>th</sup> percentiles. Whiskers extend to the most extreme data points not considered outliers.

**A microbial origin of GBS methane?** To evaluate the influence of biological methane, possibly

from *M. nevadense*, on the overall methane pool dissolved in the hot spring water, we collected

dissolved methane from seven hydrothermal pools in the Great Boiling Spring geothermal field

(Fig. S1) and determined the C and H isotope composition. These values reveal a primarily

volcanic/sedimentary thermogenic origin of the dissolved methane from all pools (Fig. 5A), given that lower values of  $\delta^{13}\text{C}$  and  $\delta^2\text{H}$  are associated with biogenic processes (Schoell, 1988).

375 In contrast to microbial methanogenesis, thermogenic methane production is an abiotic process, although thermogenic methane originates from biologically produced material, i.e., high molecular weight carbon (Schoell, 1988; Etiope *et al.*, 2011). However, the  $\delta^{13}\text{C}$  of methane decreases by up to  $\sim 10\text{‰}$  in individual pools of 48-94 °C (GBSTb, GBSTa, G04b, GBS19), suggesting the potential contribution of hydrogenotrophic methane production at these sites  
380 (Bradley and Summons, 2010). The more positive  $\delta^2\text{H}$  values in methane from spring G04c perhaps result from mixing with methane from the air due to less upwelling water movement ( $>1.5$  days residence time in G04 springs, (Costa *et al.*, 2009)). We complemented the isotope data with methane formation rates from *in-situ* anoxic sediment incubations in a subset of pools. Biogenic methane would be consistent with a significant methane accumulation over time.

385 Reflecting the more negative  $\delta^{13}\text{C}$  results at G04b, methane production here was  $> 20\text{ nmol methane g}^{-1}\text{ sediment day}^{-1}$  higher than in SSW or GBS (Fig. 5A, inset). Although this supports the idea that biological methane influences total dissolved methane abundances through mixing, a higher sample size would be needed to corroborate this trend. Methane produced by the XG-degrading culture was indistinguishable from GBS methane in its  $^{13}\text{C}$  composition but exhibited  
390 a strong depletion in  $^2\text{H}$ , conforming with its biological origin. Because of this difference, we compared  $\delta^2\text{H}$  values in methane from various biogenic pathways revealing a large data spread across studies (Fig. 5B). Regardless of this variability, methane putatively produced by *M. nevadense* resembled most closely that originating from methylotrophic and hydrogenotrophic pathways based on  $\delta^2\text{H}$ . Overall, our isotopic analysis shows a dominance of abiotic methane in

GBS waters, with potential contributions from methyl- and H<sub>2</sub>-dependent microbial methane production at some sites.

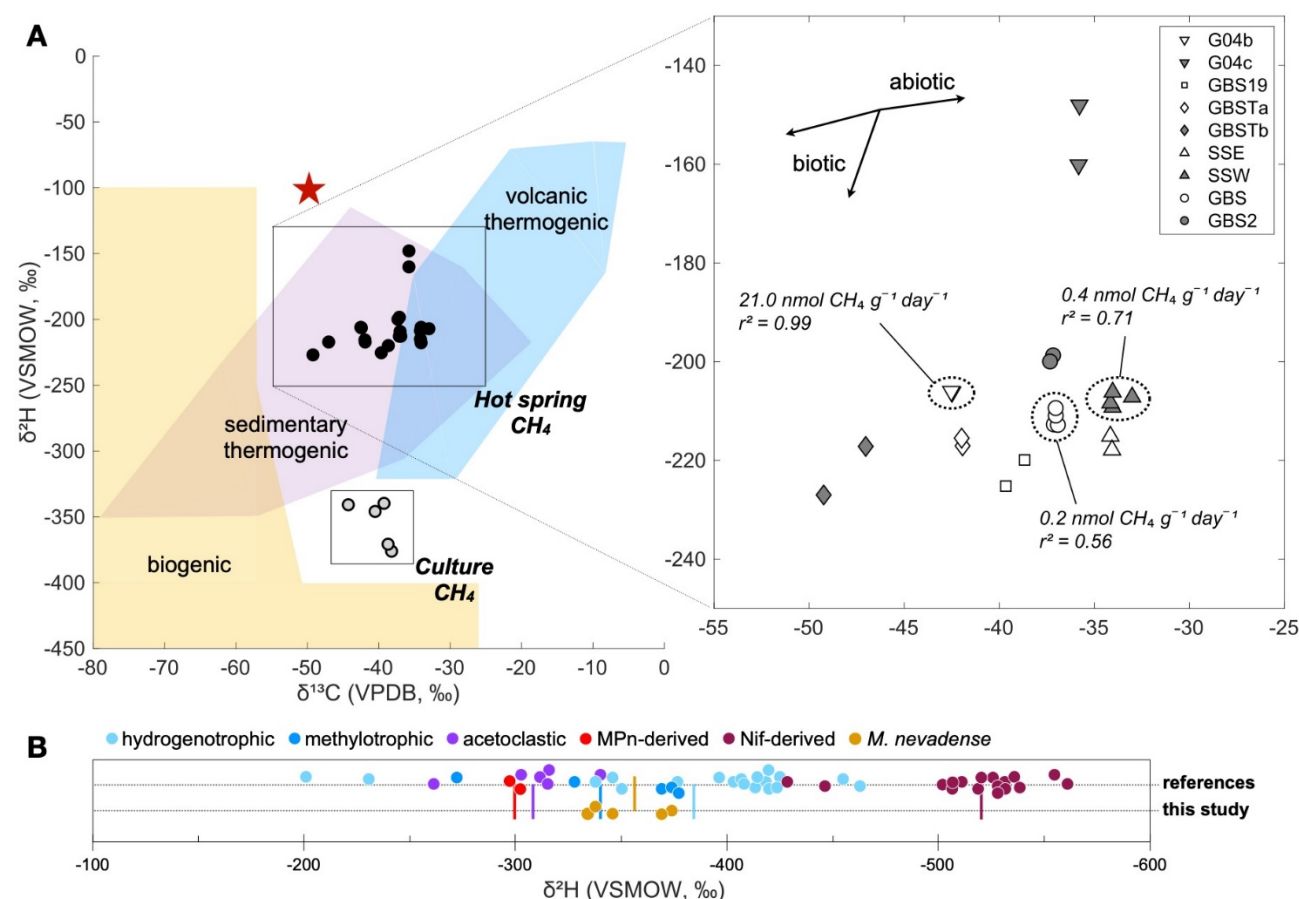

**Fig. 5.** Isotopic composition of *in-situ* and culture methane gas in a  $\delta^{13}\text{C}$ -  $\delta^2\text{H}$  space. **A** Known ranges of values (Schoell, 1988) may indicate the origin of methane at GBS. Atmospheric methane is indicated by a red star as reference. Rates in the inset were derived by hot spring *in-situ* incubations. See Fig. S2 for location information and basic geochemical data on individual hot springs. **B**  $\delta^2\text{H}$  of methane from culture headspace and reference data from hydrogenotrophic, methylotrophic, acetoclastic (Gruen *et al.*, 2018), methylphosphonate (MPn)-derived (Taenzer *et al.*, 2020), and nitrogenase (Nif)-derived (Luxem *et al.*, 2020) methane production pathways. Colored vertical lines indicate means in  $\delta^2\text{H}$  of individual pathways.

## Discussion

We present evidence that a previously uncultured member of the *Archaeoglobaceae*, *M.*

*nevadense*, harbors a divergent Mcr and is capable of methane production (Figs 1 and 2). Our calculated cell-specific methanogenesis rates of 78.9-176 fmol cell<sup>-1</sup> day<sup>-1</sup> reside between 0.5 fmol cell<sup>-1</sup> day<sup>-1</sup> (Beulig *et al.*, 2019) and 576-43,200 fmol cell<sup>-1</sup> day<sup>-1</sup> (Ver Eecke *et al.*, 2013; Topçuoğlu *et al.*, 2016; 2019; Stewart *et al.*, 2019) derived from pure cultures of mesophilic (lower boundary) and hyperthermophilic (upper boundary) deep-sea methanogens.

Methanogenic rates mediated by *Archaeoglobi* are therefore competitive with rates mediated by other Euryarchaeota. Based on the cultivation experiments, we postulate four possible modes of methane formation in the XG-degrading culture (Fig. 6), two of which we can rule out as explanations for our observations.

First, *M. nevadense* directly depolymerizes XG to mineralize the resulting sugars into methane gas (Fig. 6, panel A). Methane accumulation in the presence of bacterial antibiotics and favorability of XG over all other substrates tested would suggest this mode, however, the *M. nevadense* genome does not indicate any genes typically associated with XG breakdown, including glycoside hydrolases (Kampik *et al.*, 2021), rendering direct XG metabolism unlikely.

Second, the observed methane is produced as an accidental byproduct of other biochemical processes, also described as “mini-methanogenesis” (Fig. 6, panel B). Several isolated *Archaeoglobus* strains are known to produce methane in an Mcr-independent process. Sulfate-reducing strains of *Archaeoglobus fulgidus* are capable of making methane at < 200 µmol L<sup>-1</sup> culture (Stetter *et al.*, 1987; Beeder *et al.*, 1994) and the sulfite-reducing *Archaeoglobus*

*veneficus* produces methane at 0.6-2  $\mu\text{mol L}^{-1}$  culture (Huber *et al.*, 1997). *Archaeoglobus infectus*, isolated from an active submarine volcano in the Western Pacific, also reduces sulfite and generates methane at  $\sim 5 \mu\text{mol L}^{-1}$  culture (Mori *et al.*, 2008). The source of the trace amounts of methane in these pure cultures is thought to be a spurious side-reaction of carbon monoxide (CO) dehydrogenase (Vorholt *et al.*, 1995; Klenk *et al.*, 1997). Methane production in these *Archaeoglobus* cultures may serve to export excess reducing equivalents rather than for conserving energy. *M. nevadense*'s complete Mcr gene cluster (Fig. 3) and the observation that methane production is blocked by BES addition (Fig. 1C) robustly suggests that Mcr-independent mini-methanogenesis is not responsible for methane production in *M. nevadense*.

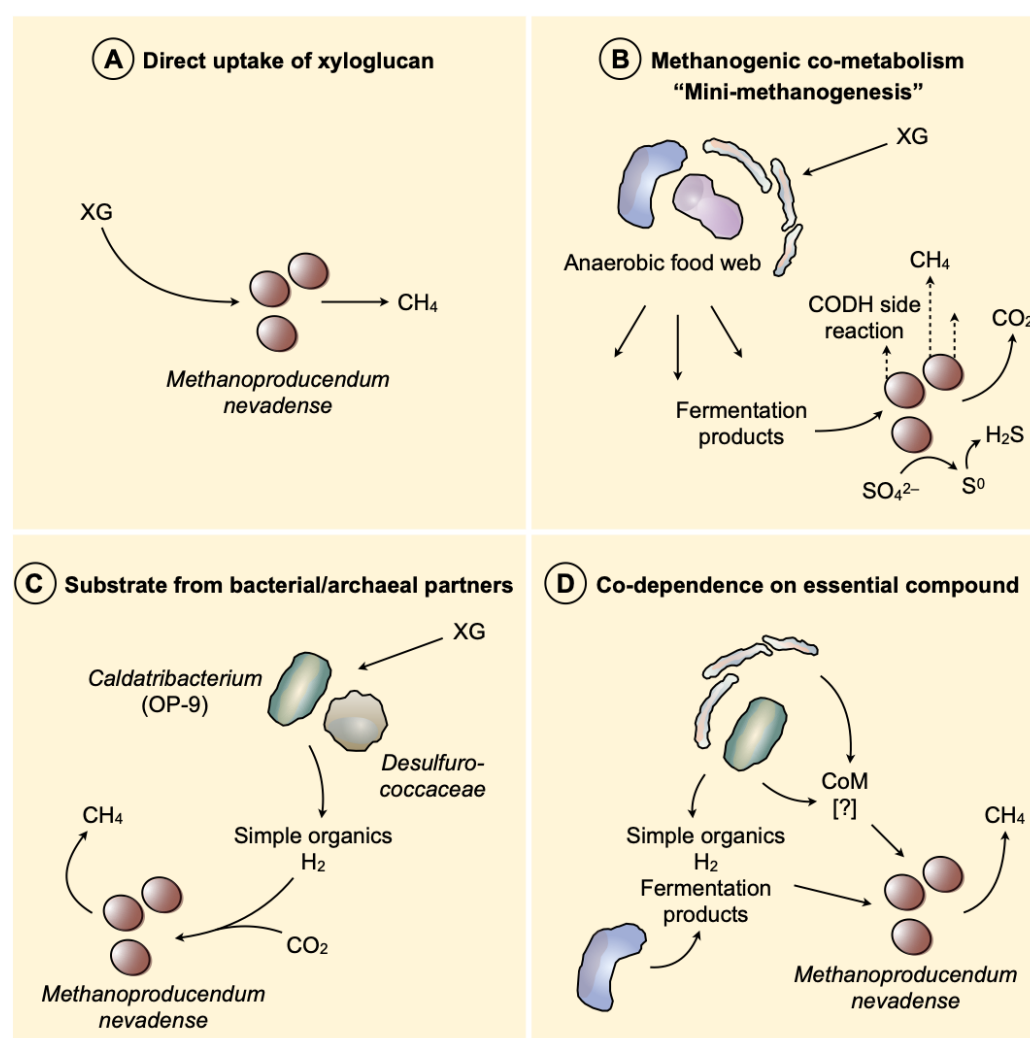



**Fig. 6.** Schematic illustration of postulated modes of methane formation by *M. nevadense* in the xyloglucan enrichment culture. Fermenters other than depicted here are possible (see text). Mechanisms in panels C and D are considered more likely than those in A and B. CODH, carbon monoxide dehydrogenase.

Third, *M. nevadense* lives in a syntrophic relationship with partner bacteria or archaea (Fig. 6, panel C). *Ca. Caldatribacterium*, *Ca. Fervidibacter*, *Fervidobacterium*, *Dictyoglomus*, or *Desulfurococcaceae*, each genomically predicted or known to depolymerize polysaccharides, could degrade XG to simple organics (XG monomers) and H<sub>2</sub> that is recycled to methane by *M. nevadense*. This mode would make XG degradation more energetically favorable under conditions with limited terminal electron acceptors. The lower but sustained methane production in the presence of antibiotics argues against strict reliance on bacterial partners and suggests an archaeal-archaeal partnership with yet-uncultivated *Desulfurococcaceae* (Graham *et al.*, 2011). The fact that the XG monomers fucose, xylose and galactose stimulated methane production (Fig. 1C), albeit not to the level of XG, is also supportive of that proposed mode. Cultured members of the *Archaeoglobaceae* metabolize a much broader range of carbon substrates than cultured methanogens. There is no methanogen known that can grow by fermenting pyruvate or glucose, for example. Our genome analysis (Fig. 3) highlights multiple potential pathways for energy conservation from methanogenesis in *M. nevadense* by using a variety of methylated compounds on their own or with electrons sourced from H<sub>2</sub> or the fermentation of more complex carbon compounds. Comparing the amount of methane produced (Fig. 1A) to the amount of H<sub>2</sub> consumed (Fig. 4) by the enrichment culture, we note that the molar H<sub>2</sub>/methane ratio we measure (~1.2) deviates from the theoretical stoichiometric ratio expected if methanogenesis is strictly hydrogenotrophic (4). It is possible that methanogenic *Archaeoglobi* occupy a more metabolically versatile niche as compared to traditional methanogens, where they can utilize a



wide range of carbon substrates generated from complex carbon breakdown supplemented with H<sub>2</sub> consumption.

Fourth, *M. nevadense* metabolizes fermentation products derived from XG degradation but is also dependent on other compounds provided by the microbial community, such as vitamins and cofactors (Fig. 6, panel D). This mode would explain our observation that culture-derived H<sub>2</sub> was consumed by methanogenesis, whereas exogenous H<sub>2</sub> in the absence of XG or other organic carbon was not (Fig. 4 versus Fig. 1C). As a refinement of the third mode, the methanogen could still live in syntrophy with another archaeal species. CoM may be such a cofactor obligately required for methane metabolism (Gunsalus and Wolfe, 1977; Mori *et al.*, 2008), together with vitamins such as folate (Buchenau and Thauer, 2004) or amino acids. However, in our experiments, CoM addition to XG-grown cultures did not stimulate methanogenesis, suggesting additional dependence on an essential compound and/or an already saturated supply of CoM by other members of the community.

Concerning the question about the origin of methane at GBS, our data suggest that it is primarily thermogenic (abiotic), in line with methane fluxes correlating with temperature in GBS pools (Hedlund *et al.*, 2011). The range in  $\delta^{13}\text{C}$  of our measurements (Fig. 5A) is congruent with data collected in pyrolysis experiments at 400 and 500 °C involving montmorillonite clays (Sackett, 1978). As reaction mechanism, carbon bond cleavage via an acid-activated carbonium ion at the clay mineral surface has been proposed (Greensfelder *et al.*, 1949). Such a mineral-catalyzed mechanism would be feasible within the sedimentary deposits at GBS that are composed of clays from the Eastern Sierra Nevada (Birkeland and Janda, 1971). The location of the culture methane

in  $\delta^{13}\text{C}$ -  $\delta^2\text{H}$  space extends the coverage of biogenic methane, and we propose that methane  
 490 retrieved from thermal systems exhibiting similar  $\delta^{13}\text{C}$ -  $\delta^2\text{H}$  values to be considered biogenic in  
 origin. Comparing our  $\delta^2\text{H}$  data to reference data derived from methane produced by well-  
 characterized thermophilic methanogens (Fig. 5B) supports the use of methyl groups and  $\text{H}_2$   
 inferred from our genomic analysis.

## 495 Conclusion

We conclude that *M. nevadense* is a methanogen with a highly versatile and possibly syntrophic  
 lifestyle. In addition to using sugars and organic acids to fuel methanogenesis, our experimental  
 (methane production with MBA addition) and genomic data (a complete MtoABCD complex)  
 500 suggest *M. nevadense* is capable of methoxydotrophic methanogenesis (Mayumi *et al.*, 2016), a  
 methanogenic pathway not previously demonstrated in thermophiles. This metabolic flexibility  
 enables *M. nevadense* to cooperate with diverse microbial partners and to adapt to a wide array  
 of organic carbon sources. Because of the close relationship between the *M. nevadense* Mcr  
 complex and others from diverse uncultivated archaea (Fig. 2B), we propose that the similarly  
 505 divergent Mcr complexes in Korarchaeota, Nezharchaeota, Verstraetearchaeota, and other  
*Archaeoglobi* are also functional and likely generate methane (Vanwonterghem *et al.*, 2016;  
 Berghuis *et al.*, 2019). Our findings may also expand methane metabolism to a wider range of  
 hot spring chemistries (Reigstad *et al.*, 2010). Taken together, our study represents a first step to  
 experimentally verify the genomic potential contemplated for a variety of Mcr-encoding archaea.  
 510 Future studies will further unravel the significance of such lineages in the evolution of methane  
 metabolism and as source of biological methane on Earth.

## Data Availability

Metagenome and 16S rRNA gene sequence data will be deposited in the NCBI database upon publication.

## Acknowledgements

We thank Marike Palmer for advice on systematics, Alma Parada for discussions about the computational approach, Alexander Jaffe for feedback on the manuscript, David and Sandy Jamieson for access to Great Boiling Spring, Alexander Manriquez for help with sampling at GBS, and Michael Morikone for initial metagenome analysis of the xyloglucan culture. We appreciate the CSUSB Genomics course of Spring 2018 for assistance with xyloglucan culture DNA extraction and long read sequencing.

## Author Contributions

SB and AED developed the experimental design with input from BPH and JAD. SB conducted the experiments with assistance from MEQ. JAD achieved enrichment of *M. nevadense* and has maintained the XG-degrading culture long-term. Metagenomic work was done by SB and GLC. GLC performed the metabolic modeling. SB and JAD conducted field work at GBS. SB wrote the paper with contributions from GLC, BPH and AED, and all authors edited the final version.

## Funding

Funding was provided by the National Science Foundation (NSF) grant DEB 1557042 and National Aeronautics and Space Administration (NASA) grant 80NNSC17KO548 and 80NSSC19M0150. SB was further supported by the NASA Postdoctoral Program (section Astrobiology), administered by Oak Ridge Associated Universities under contract with NASA. MEQ received critical funding from Stanford's IntroSems Plus program for undergraduate students. Additional funding for metagenomes was provided by the U. S. Department of Energy's Joint Genome Institute (DOE-JGI) under project 10.46936/10.25585/60007294 and DOE grant DE-EE0000716; the Nevada Renewable Energy Consortium, funded by the DOE.

## Competing Interests

The authors declare no competing interests.

## References

- 560 Antipov D, Korobeynikov A, McLean JS, Pevzner PA. (2016). hybridSPAdes: An algorithm for hybrid assembly of short and long reads. *Bioinformatics* **32**: 1009–1015.
- Appel L, Willistein M, Dahl C, Ermler U, Boll M. (2021). Functional diversity of prokaryotic HdrA(BC) modules: Role in flavin-based electron bifurcation processes and beyond. *Biochim Biophys Acta Bioenerg* **1862**: 148379.
- 565 Arias P, Bellouin N, Coppola E, Jones R, Krinner G, Marotzke J, *et al.* (2021). Climate Change 2021: The physical science basis. Contribution of working group I to the sixth assessment report of the Intergovernmental Panel on Climate Change (IPCC). 2391.
- Arkin AP, Cottingham RW, Henry CS, Harris NL, Stevens RL, Maslov S, *et al.* (2018). KBase: The United States Department of Energy Systems Biology Knowledgebase. *Nat Biotechnol* **36**: 566–569.
- 570 Baptiste É, Brochier C, Boucher Y. (2005). Higher-level classification of the Archaea: evolution of methanogenesis and methanogens. *Archaea* **1**: 353–363.
- Beeder J, Nilsen RK, Rosnes JT, Torsvik T, Lien T. (1994). *Archaeoglobus fulgidus* isolated from hot North Sea oil field waters. *Appl Environ Microbiol* **60**: 1227–1231.
- 575 Berghuis BA, Yu FB, Schulz F, Blainey PC, Woyke T, Quake SR. (2019). Hydrogenotrophic methanogenesis in archaeal phylum Verstraetearchaeota reveals the shared ancestry of all methanogens. *Proc Natl Acad Sci USA* **116**: 5037–5044.
- Beulig F, Røy H, McGlynn SE, Jørgensen BB. (2019). Cryptic CH<sub>4</sub> cycling in the sulfate–methane transition of marine sediments apparently mediated by ANME-1 archaea. *ISME J* **13**: 250–262.
- 580 Birkeland PW, Janda RJ. (1971). Clay mineralogy of soils developed from Quaternary deposits of the eastern Sierra Nevada, California. *Geol Soc Am Bull* **82**: 2495–2514.
- Boyd JA, Jungbluth SP, Leu AO, Evans PN, Woodcroft BJ, Chadwick GL, *et al.* (2019). Divergent methyl-coenzyme M reductase genes in a deep-subseafloor Archaeoglobi. *ISME J* **13**: 1269–1279.
- 585 Boyd JA, Woodcroft BJ, Tyson GW. (2018). GraftM: a tool for scalable, phylogenetically informed classification of genes within metagenomes. *Nucleic Acids Res* **46**: e59.
- Bradley AS, Summons RE. (2010). Multiple origins of methane at the Lost City Hydrothermal Field. *Earth Planet Sci Lett* **297**: 34–41.
- 590 Brüggemann H, Falinski F, Deppenmeier U. (2000). Structure of the F<sub>420</sub>H<sub>2</sub>:quinone oxidoreductase of *Archaeoglobus fulgidus*. *Eur J Biochem* **267**: 5810–5814.

- 595 Buchenau B, Thauer RK. (2004). Tetrahydrofolate-specific enzymes in *Methanosarcina barkeri* and growth dependence of this methanogenic archaeon on folic acid or p-aminobenzoic acid. *Arch Microbiol* **182**: 313–325.
- Buessecker S, Palmer M, Lai D, Dimapilis J, Mayali X, Mosier D, *et al.* (2022). An essential role for tungsten in the ecology and evolution of a previously uncultivated lineage of anaerobic, thermophilic Archaea. *Nat Commun* **13**: 1–13.
- 600 Callahan BJ, McMurdie PJ, Rosen MJ, Han AW, Johnson AJA, Holmes SP. (2016). DADA2: High-resolution sample inference from Illumina amplicon data. *Nat Methods* **13**: 581–583.
- Chaumeil PA, Mussig AJ, Hugenholtz P, Parks DH. (2020). GTDB-Tk: a toolkit to classify genomes with the Genome Taxonomy Database. *Bioinformatics* **36**: 1925–1927.
- Chen S-C, Musat N, Lechtenfeld OJ, Paschke H, Schmidt M, Said N, *et al.* (2019). Anaerobic oxidation of ethane by archaea from a marine hydrocarbon seep. *Nature* **568**: 108–111.
- 605 Cole JK, Peacock JP, Dodsworth JA, Williams AJ, Thompson DB, Dong H, *et al.* (2013). Sediment microbial communities in Great Boiling Spring are controlled by temperature and distinct from water communities. *ISME J* **7**: 718–729.
- Costa KC, Navarro JB, Shock EL, Zhang CL, Soukup D, Hedlund BP. (2009). Microbiology and geochemistry of great boiling and mud hot springs in the United States Great Basin. *Extremophiles* **13**: 447–459.
- 610 Duarte AG, Santos AA, Pereira IAC. (2016). Electron transfer between the QmoABC membrane complex and adenosine 5'-phosphosulfate reductase. *Biochim Biophys Acta Bioenerg* **1857**: 380–386.
- Ellefson WL, Wolfe RS. (1980). Role of component C in the methylreductase system of *Methanobacterium*. *J Biol Chem* **255**: 8388–8389.
- 615 Eren AM, Kiefl E, Shaiber A, Veseli I, Miller SE, Schechter MS, *et al.* (2021). Community-led, integrated, reproducible multi-omics with anvi'o. *Nat Microbiol* **6**: 3–6.
- Ermler U, Grabarse W, Shima S, Goubeaud M, Thauer RK. (1997). Crystal structure of methyl-coenzyme M reductase: The key enzyme of biological methane formation. *Science* **278**: 1457–1462.
- 620 Etiope G, Schoell M, Hosgörmez H. (2011). Abiotic methane flux from the Chimaera seep and Tekirova ophiolites (Turkey): Understanding gas exhalation from low temperature serpentinization and implications for Mars. *Earth Planet Sci Lett* **310**: 96–104.
- Graham JE, Clark ME, Nadler DC, Huffer S, Chokhawala HA, Rowland SE, *et al.* (2011). Identification and characterization of a multidomain hyperthermophilic cellulase from an archaeal enrichment. *Nat Commun* **2**: 1–9.
- 625

- Greensfelder BS, Voge HH, Good GM. (1949). Catalytic and thermal cracking of pure hydrocarbons: Mechanisms of Reaction. *Ind Eng Chem* **41**: 2573–2584.
- 630 Gruen DS, Wang DT, Könneke M, Topçuoğlu BD, Stewart LC, Goldhammer T, *et al.* (2018). Experimental investigation on the controls of clumped isotopologue and hydrogen isotope ratios in microbial methane. *Geochim Cosmochim Acta* **237**: 339–356.
- Gunsalus RP, Wolfe RS. (1977). Stimulation of CO<sub>2</sub> reduction to methane by methyl-coenzyme M in extracts of *Methanobacterium*. *Biochem Biophys Res Commun* **76**: 790–795.
- 635 Hahn CJ, Laso-Pérez R, Vulcano F, Vaziourakis K-M, Stokke R, Steen IH, *et al.* (2020). ‘*Candidatus Ethanoperedens*,’ a thermophilic genus of *Archaea* mediating the anaerobic oxidation of ethane. *mBio* **11**: 1–18.
- Hallam SJ, Putnam N, Preston CM, Detter JC, Rokhsar D, Richardson PM, *et al.* (2004). Reverse methanogenesis: Testing the hypothesis with environmental genomics. *Science* **305**: 1457–1462.
- 640 Hanada S, Hiraishi A, Shimada K, Matsuura K. (1995). *Chloroflexus aggregans* sp. nov., a filamentous phototrophic bacterium which forms dense cell aggregates by active gliding movement. *Int J Sys Evol Microbiol* **45**: 676–681.
- Hedlund BP, Chuvochina M, Hugenholtz P, Konstantinidis KT, Murray AE, Palmer M, *et al.* (2022). SeqCode: a nomenclatural code for prokaryotes described from sequence data. *Nat Microbiol* **7**: 1702–1708.
- 645 Hedlund BP, McDonald AI, Lam J, Dodsworth JA, Brown JR, Hungate BA. (2011). Potential role of *Thermus thermophilus* and *T. oshimai* in high rates of nitrous oxide (N<sub>2</sub>O) production in ~80 °C hot springs in the US Great Basin. *Geobiology* **9**: 471–480.
- Hedlund BP, Thomas SC, Dodsworth JA, Zhang CL. (2015). Life in high-temperature environments. In: *Manual of Environmental Microbiology*. John Wiley & Sons, Ltd, pp 4.3.4–1–  
650 4.3.4–15.
- Hua Z-S, Wang Y-L, Evans PN, Qu Y-N, Goh KM, Rao Y-Z, *et al.* (2019). Insights into the ecological roles and evolution of methyl-coenzyme M reductase-containing hot spring *Archaea*. *Nat Commun* **10**: 1–11.
- 655 Huber H, Jannasch H, Rachel R, Fuchs T, Stetter KO. (1997). *Archaeoglobus veneficus* sp. nov., a novel facultative chemolithoautotrophic hyperthermophilic sulfite reducer, isolated from abyssal black smokers. *Syst Appl Microbiol* **20**: 374–380.
- Jain C, Rodriguez-R LM, Phillippy AM, Konstantinidis KT, Aluru S. (2018). High throughput ANI analysis of 90K prokaryotic genomes reveals clear species boundaries. *Nat Commun* **9**: 1–8.
- 660 Kampik C, Liu N, Mroueh M, Franche N, Borne R, Denis Y, *et al.* (2021). Handling several sugars at a time: A case study of xyloglucan utilization by *Ruminiclostridium cellulolyticum*. *mBio* **12**: 1–20.



- Kang DD, Li F, Kirton E, Thomas A, Egan R, An H, *et al.* (2019). MetaBAT 2: an adaptive binning algorithm for robust and efficient genome reconstruction from metagenome assemblies. *PeerJ* **7**: e7359.
- 665 Klenk H-P, Clayton RA, Tomb J-F, White O, Nelson KE, Ketchum KA, *et al.* (1997). The complete genome sequence of the hyperthermophilic, sulphate-reducing archaeon *Archaeoglobus fulgidus*. *Nature* **390**: 364–370.
- Kozich JJ, Westcott SL, Baker NT, Highlander SK, Schloss PD. (2013). Development of a dual-index sequencing strategy and curation pipeline for analyzing amplicon sequence data on the  
670 MiSeq Illumina Sequencing Platform. *Appl Environ Microbiol* **79**: 5112–5120.
- Langmead B, Salzberg SL. (2012). Fast gapped-read alignment with Bowtie 2. *Nat Methods* **9**: 357–359.
- Laso-Pérez R, Wegener G, Knittel K, Widdel F, Harding KJ, Krukenberg V, *et al.* (2016). Thermophilic archaea activate butane via alkyl-coenzyme M formation. *Nature* **539**: 396–401.
- 675 Letunic I, Bork P. (2021). Interactive Tree Of Life (iTOL) v5: an online tool for phylogenetic tree display and annotation. *Nucleic Acids Res* **49**: W293–W296.
- Liu Y-F, Chen J, Zaramela LS, Wang L-Y, Mbadinga SM, Hou Z-W, *et al.* (2020). Genomic and transcriptomic evidence supports methane metabolism in *Archaeoglobi*. *mSystems* **5**: 1–16.
- Luxem KE, Leavitt WD, Zhang X. (2020). Large hydrogen isotope fractionation distinguishes  
680 nitrogenase-derived methane from other methane sources. *Appl Environ Microbiol* **86**: 1–15.
- Mayumi D, Mochimaru H, Tamaki H, Yamamoto K, Yoshioka H, Suzuki Y, *et al.* (2016). Methane production from coal by a single methanogen. *Science* **354**: 222–225.
- Mori K, Maruyama A, Urabe T, Suzuki K-I, Hanada S. (2008). *Archaeoglobus infectus* sp. nov., a novel thermophilic, chemolithoheterotrophic archaeon isolated from a deep-sea rock collected  
685 at Suiyo Seamount, Izu-Bonin Arc, western Pacific Ocean. *Int J Sys Evol Microbiol* **58**: 810–816.
- Parks DH, Imelfort M, Skennerton CT, Hugenholtz P, Tyson GW. (2015). CheckM: assessing the quality of microbial genomes recovered from isolates, single cells, and metagenomes. *Genome Res* **25**: 1043–1055.
- 690 Pavlov AA, Brown LL, Kasting JF. (2001). UV shielding of NH<sub>3</sub> and O<sub>2</sub> by organic hazes in the Archean atmosphere. *J Geophys Res Atmos* **106**: 23267–23287.
- Peacock JP, Cole JK, Murugapiran SK, Dodsworth JA, Fisher JC, Moser DP, *et al.* (2013). Pyrosequencing reveals high-temperature cellulolytic microbial consortia in Great Boiling Spring after in situ lignocellulose enrichment. *PLoS ONE* **8**: e59927.
- 695 Reigstad LJ, Jorgensen SL, Schleper C. (2010). Diversity and abundance of *Korarchaeota* in terrestrial hot springs of Iceland and Kamchatka. *ISME J* **4**: 346–356.

- Richter M, Rosselló-Móra R, Glöckner FO, Peplies J. (2016). JSpeciesWS: A web server for prokaryotic species circumscription based on pairwise genome comparison. *Bioinformatics* **32**: 929–931.
- 700 Sackett WM. (1978). Carbon and hydrogen isotope effects during the thermocatalytic production of hydrocarbons in laboratory simulation experiments. *Geochim Cosmochim Acta* **42**: 571–580.
- Schoell M. (1988). Multiple origins of methane in the Earth. *Chem Geol* **71**: 1–10.
- Stetter KO, Lauerer G, Thomm M, Neuner A. (1987). Isolation of extremely thermophilic sulfate reducers: Evidence for a novel branch of Archaeobacteria. *Science* **236**: 822–824.
- 705 Stewart LC, Algar CK, Fortunato CS, Larson BI, Vallino JJ, Huber JA, *et al.* (2019). Fluid geochemistry, local hydrology, and metabolic activity define methanogen community size and composition in deep-sea hydrothermal vents. *ISME J* **13**: 1711–1721.
- Taenzer L, Labidi J, Masterson AL, Feng X, Rumble D III, Young ED, *et al.* (2020). Low  $\Delta^{12}\text{CH}_2\text{D}_2$  values in microbialgenic methane result from combinatorial isotope effects. *Geochim*
- 710 *Cosmochim Acta* **285**: 225–236.
- Takai K, Nakamura K, Toki T, Tsunogai U, Miyazaki M, Miyazaki J, *et al.* (2008). Cell proliferation at 122°C and isotopically heavy  $\text{CH}_4$  production by a hyperthermophilic methanogen under high-pressure cultivation. *Proc Natl Acad Sci USA* **105**: 10949–10954.
- Taylor CD, McBride BC, Wolfe RS, Bryant MP. (1974). Coenzyme M, Essential for growth of a
- 715 rumen strain of *Methanobacterium ruminantium*. *J Bacteriol* **120**: 974–975.
- Topçuoğlu BD, Meydan C, Nguyen TB, Lang SQ, Holden JF. (2019). Growth kinetics, carbon isotope fractionation, and gene expression in the hyperthermophile *Methanocaldococcus Jannaschii* during hydrogen-limited growth and interspecies hydrogen transfer. *Appl Environ Microbiol* **85**: 1–14.
- 720 Topçuoğlu BD, Stewart LC, Morrison HG, Butterfield DA, Huber JA, Holden JF. (2016). Hydrogen limitation and syntrophic growth among natural assemblages of thermophilic methanogens at deep-sea hydrothermal vents. *Front Microbiol* **7**: 1–12.
- Trifinopoulos J, Nguyen L-T, Haeseler von A, Minh BQ. (2016). W-IQ-TREE: a fast online phylogenetic tool for maximum likelihood analysis. *Nucleic Acids Res* **44**: W232–W235.
- 725 Vanwonterghem I, Evans PN, Parks DH, Jensen PD, Woodcroft BJ, Hugenholtz P, *et al.* (2016). Methylophilic methanogenesis discovered in the archaeal phylum Verstraetearchaeota. *Nat Microbiol* **1**: 1–9.
- Ver Eecke HC, Akerman NH, Huber JA, Butterfield DA, Holden JF. (2013). Growth kinetics and energetics of a deep-sea hyperthermophilic methanogen under varying environmental
- 730 conditions. *Environmental Microbiology Reports* **5**: 665–671.



- Vick TJ, Dodsworth JA, Costa KC, Shock EL, Hedlund BP. (2010). Microbiology and geochemistry of Little Hot Creek, a hot spring environment in the Long Valley Caldera. *Geobiology* **8**: 140–154.
- 735 Vorholt J, Kunow J, Stetter KO, Thauer RK. (1995). Enzymes and coenzymes of the carbon monoxide dehydrogenase pathway for autotrophic CO<sub>2</sub> fixation in *Archaeoglobus lithotrophicus* and the lack of carbon monoxide dehydrogenase in the heterotrophic *A. profundus*. *Arch Microbiol* **163**: 112–118.
- Wang Y, Wegener G, Hou J, Wang F, Xiao X. (2019). Expanding anaerobic alkane metabolism in the domain of Archaea. *Nat Microbiol* **4**: 595–602.
- 740 Welte C, Deppenmeier U. (2011). Membrane-bound electron transport in *Methanosaeta thermophila*. *J Bacteriol* **193**: 2868–2870.
- Yarnes C. (2013).  $\delta^{13}\text{C}$  and  $\delta^2\text{H}$  measurement of methane from ecological and geological sources by gas chromatography/combustion/pyrolysis isotope-ratio mass spectrometry. *Rapid Communications in Mass Spectrometry* **27**: 1036–1044.
- 745 Yoon S-H, Ha S-M, Lim J, Kwon S, Chun J. (2017). A large-scale evaluation of algorithms to calculate average nucleotide identity. *Antonie van Leeuwenhoek* **110**: 1281–1286.
- Zahnle KJ. (2006). Earth’s Earliest Atmosphere. *Elements* **2**: 217–222.
